# Supplementary material
Source: MDPI journal article supplement (https://www.mdpi.com/2079-9292/9/5/753)
Supplement: s1 [file s1]

Article

# Organic Field-Effect Transistor Memory Device Based on an Integrated Carbon Quantum Dots/Polyvinyl Pyrrolidone Hybrid Nanolayer

Wenting Zhang <sup>1,2</sup>, Xiaoxing Guo <sup>1</sup>, Jinchao Yin <sup>1</sup> and Jianhong Yang <sup>1,\*</sup>

<sup>1</sup> School of Physical Science and Technology, Lanzhou University, Lanzhou 730000, China; zhangwt2014@lzu.edu.cn (W.Z.); xxguo18@lzu.edu.cn (X.G.); yinjc17@lzu.edu.cn (J.Y.)

<sup>2</sup> School of Electronic and Information Engineering, Lanzhou Jiaotong University, Lanzhou 730070, China

\* Correspondence: yangjh@lzu.edu.cn

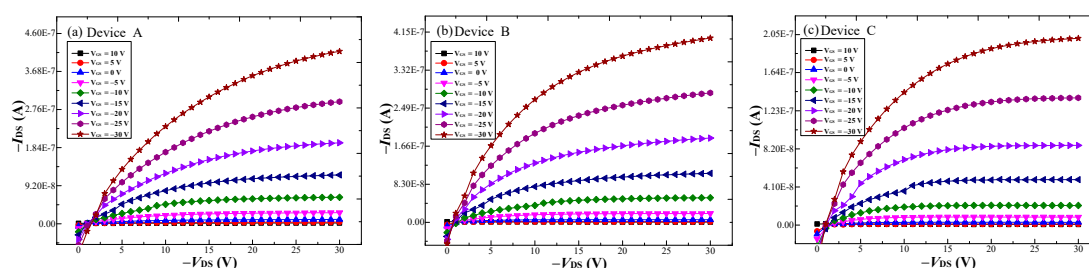

Figure S1. Output characteristics of devices A, B, and C.

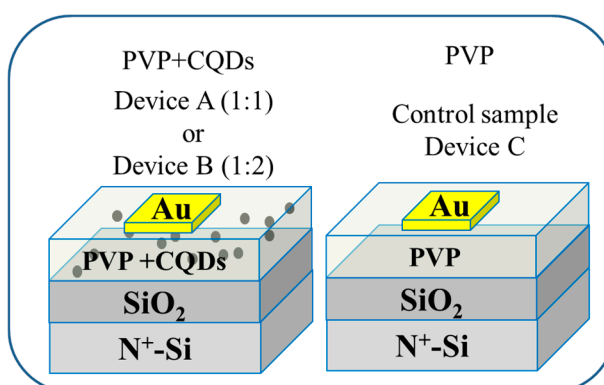

Figure S2. Device structure to measure the  $C_i$  of the bilayer insulator capacitance.

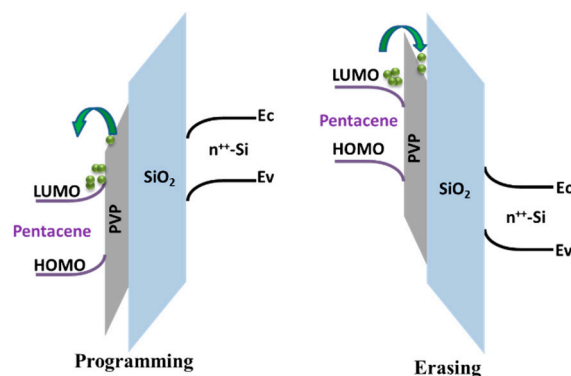

Figure S3. Energy band diagrams of device C during programming and erasing operation.

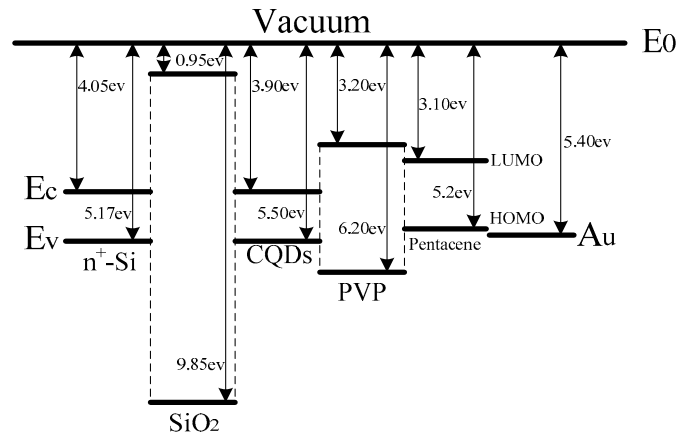

**Figure S4.** Energy level diagram of devices A and B without applying voltage.

The memory windows are measured as follow (take device A as an example):

- (1) Scanning the initial transfer characteristic curve of the device A;
- (2) The negative gate programming (P) voltage ( $V_P$ )  $-60$  V for  $0.1$  s is applied to the device A. Scanning the transfer characteristic curve of the device A after P operation.
- (3) The positive gate erasing (E) voltage ( $V_E$ )  $+60$  V for  $0.1$  s is applied to the device A. Scanning the transfer characteristic curve of the device A after E operation.
- (4) Repeat process (3) twice, the obtained two transfer characteristic curves are corresponding to the  $V_E = +60$  V for  $0.2$  s and  $V_E = +60$  V for  $0.3$  s.
- (5) The  $V_{DS}$  is kept at  $0$  V throughout the P/E operation. The transfer characteristic curves  $V_T$  shifts between the P/E operation is defined as the memory window of the device.
- (6) As a result, a memory window of approximately  $8.41$  V was obtained for device A at  $V_P = -60$  V for  $0.1$  s and  $V_E = +60$  V for  $0.3$  s.
